# Supplementary material for: Choroid Plexus Modulates Subventricular Zone Adult Neurogenesis and Olfaction Through Secretion of Small Extracellular Vesicles
Source: Research Square preprint supplement (doi:10.21203/rs.3.rs-8176257/v1), 2025-12-05
Supplement: Supplementary file 1 [file aa6ece3b9aef58d7883b5096.docx]

**Supplementary File 2 (Figures and Legends)**

**(Choroid Plexus Modulates Subventricular Zone Adult Neurogenesis… by Liu L et al)**

**Figure S1. CP expresses high level of sEV markers.**

| **A** | **B** | **C** |
| --- | --- | --- |

| **D** |  | **E** | **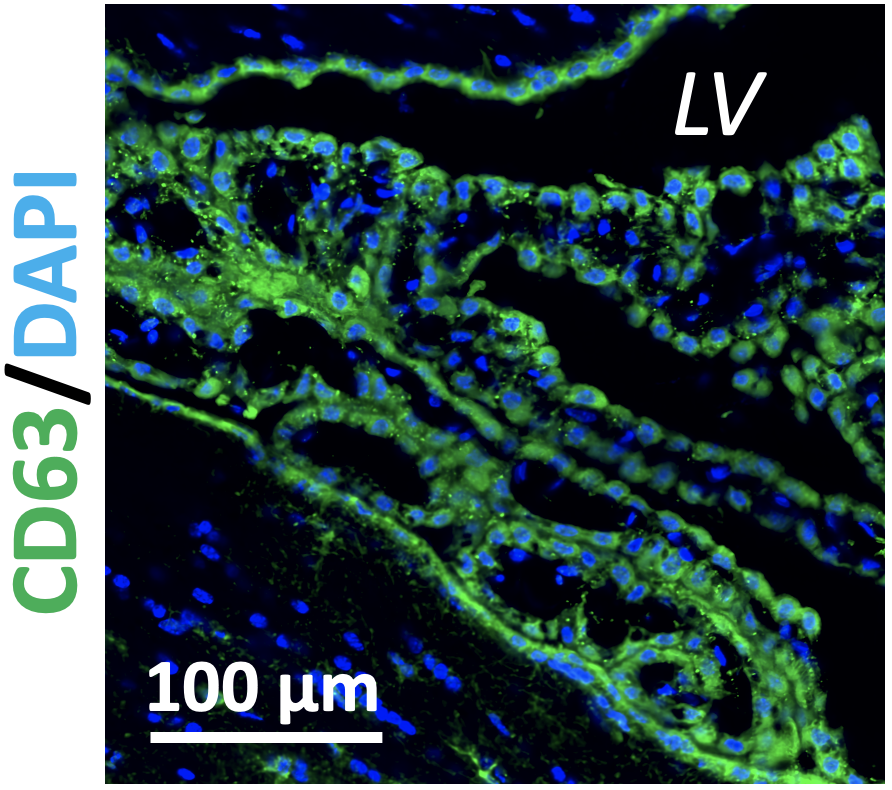** | **F** | **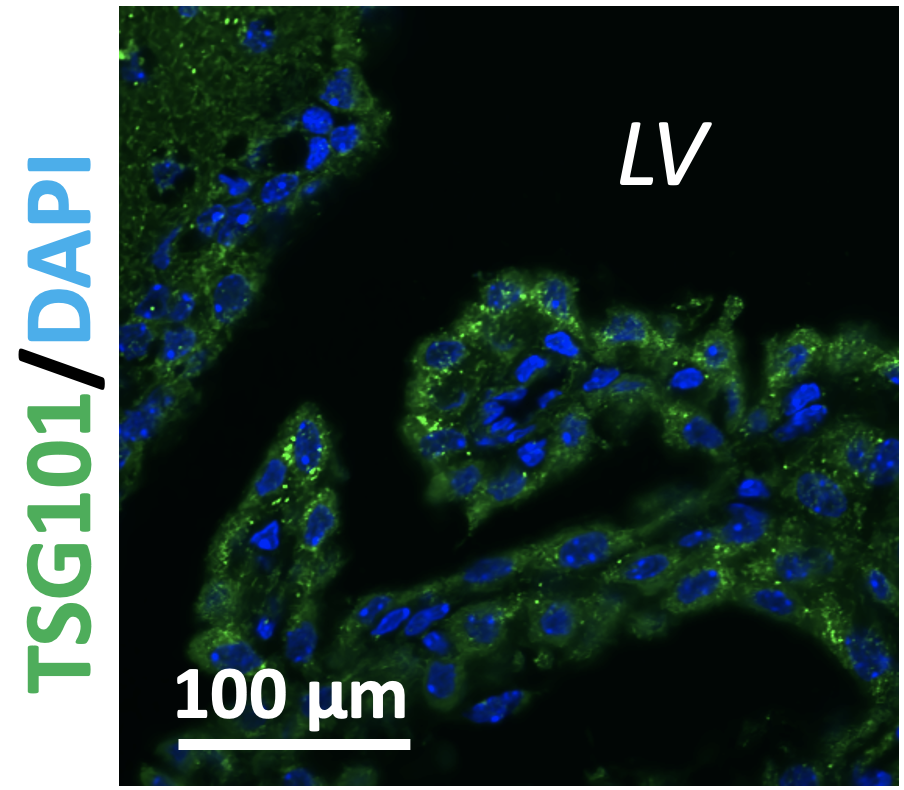** |
| --- | --- | --- | --- | --- | --- |

| **G** |
| --- |
|  |

(**A-D**). qPCR analyses for relative expressions of sEV markers across brain regions. Data of Cd9, Cd63, Cd81, and Tsg101 were provided in (A), (B), (C), and (D), respectively (n = 4). ST: striatum; HP: hippocampus; CB: cerebellum.

(**E**). IHC staining of CD63 in the CP.

(**F**). IHC staining of TSG101 in the CP.

(**G**). Effects of storage duration under 37°C on concentration of sEVs (n = 3).

**Figure S2. AAV5 does not evidently impact SVZ adult neurogenesis.**

| **A** | **B** | **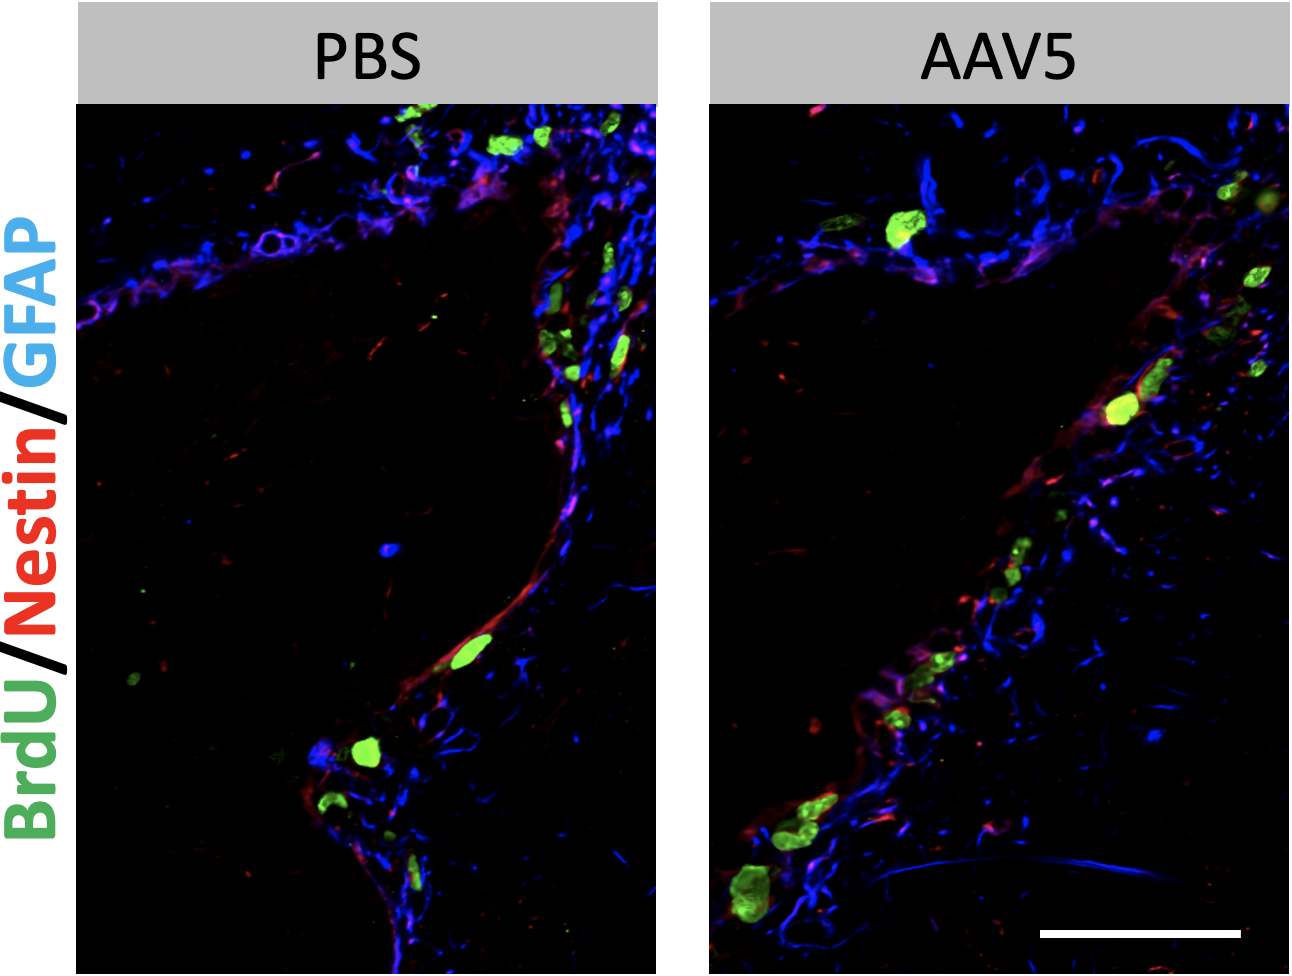** | **C** |  |
| --- | --- | --- | --- | --- |
| **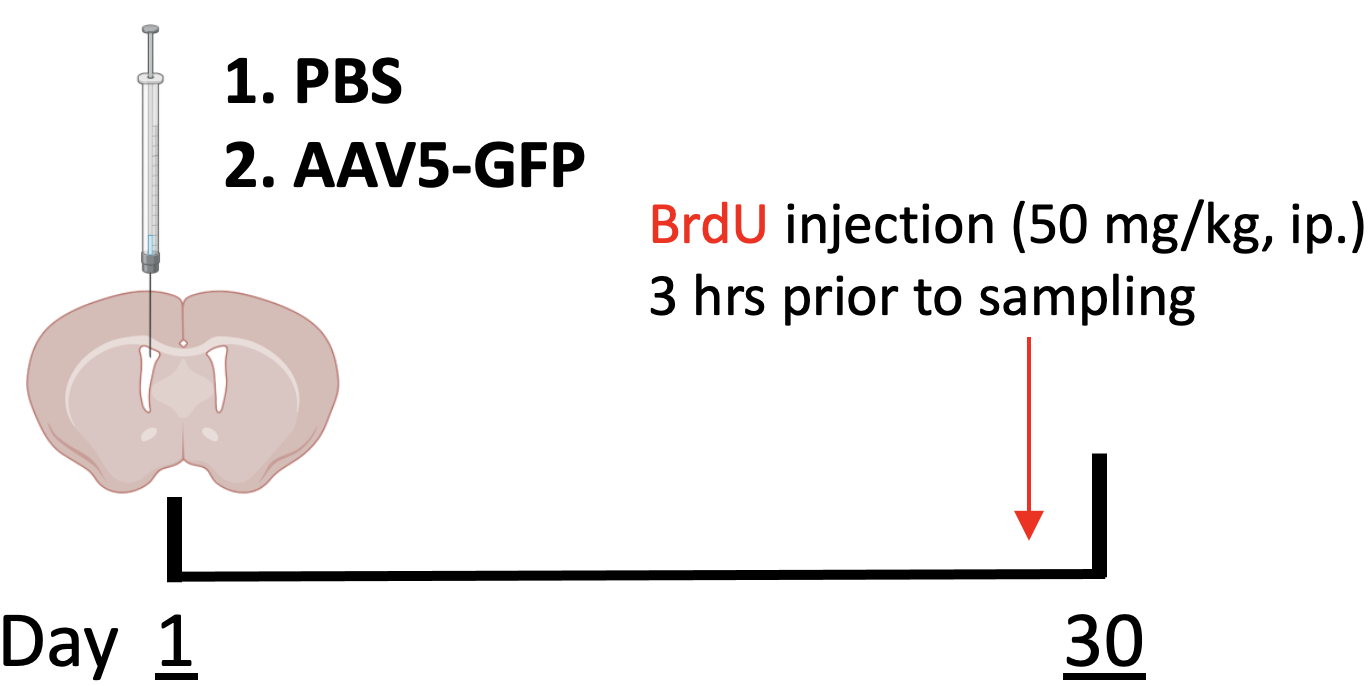** |

| **D** | **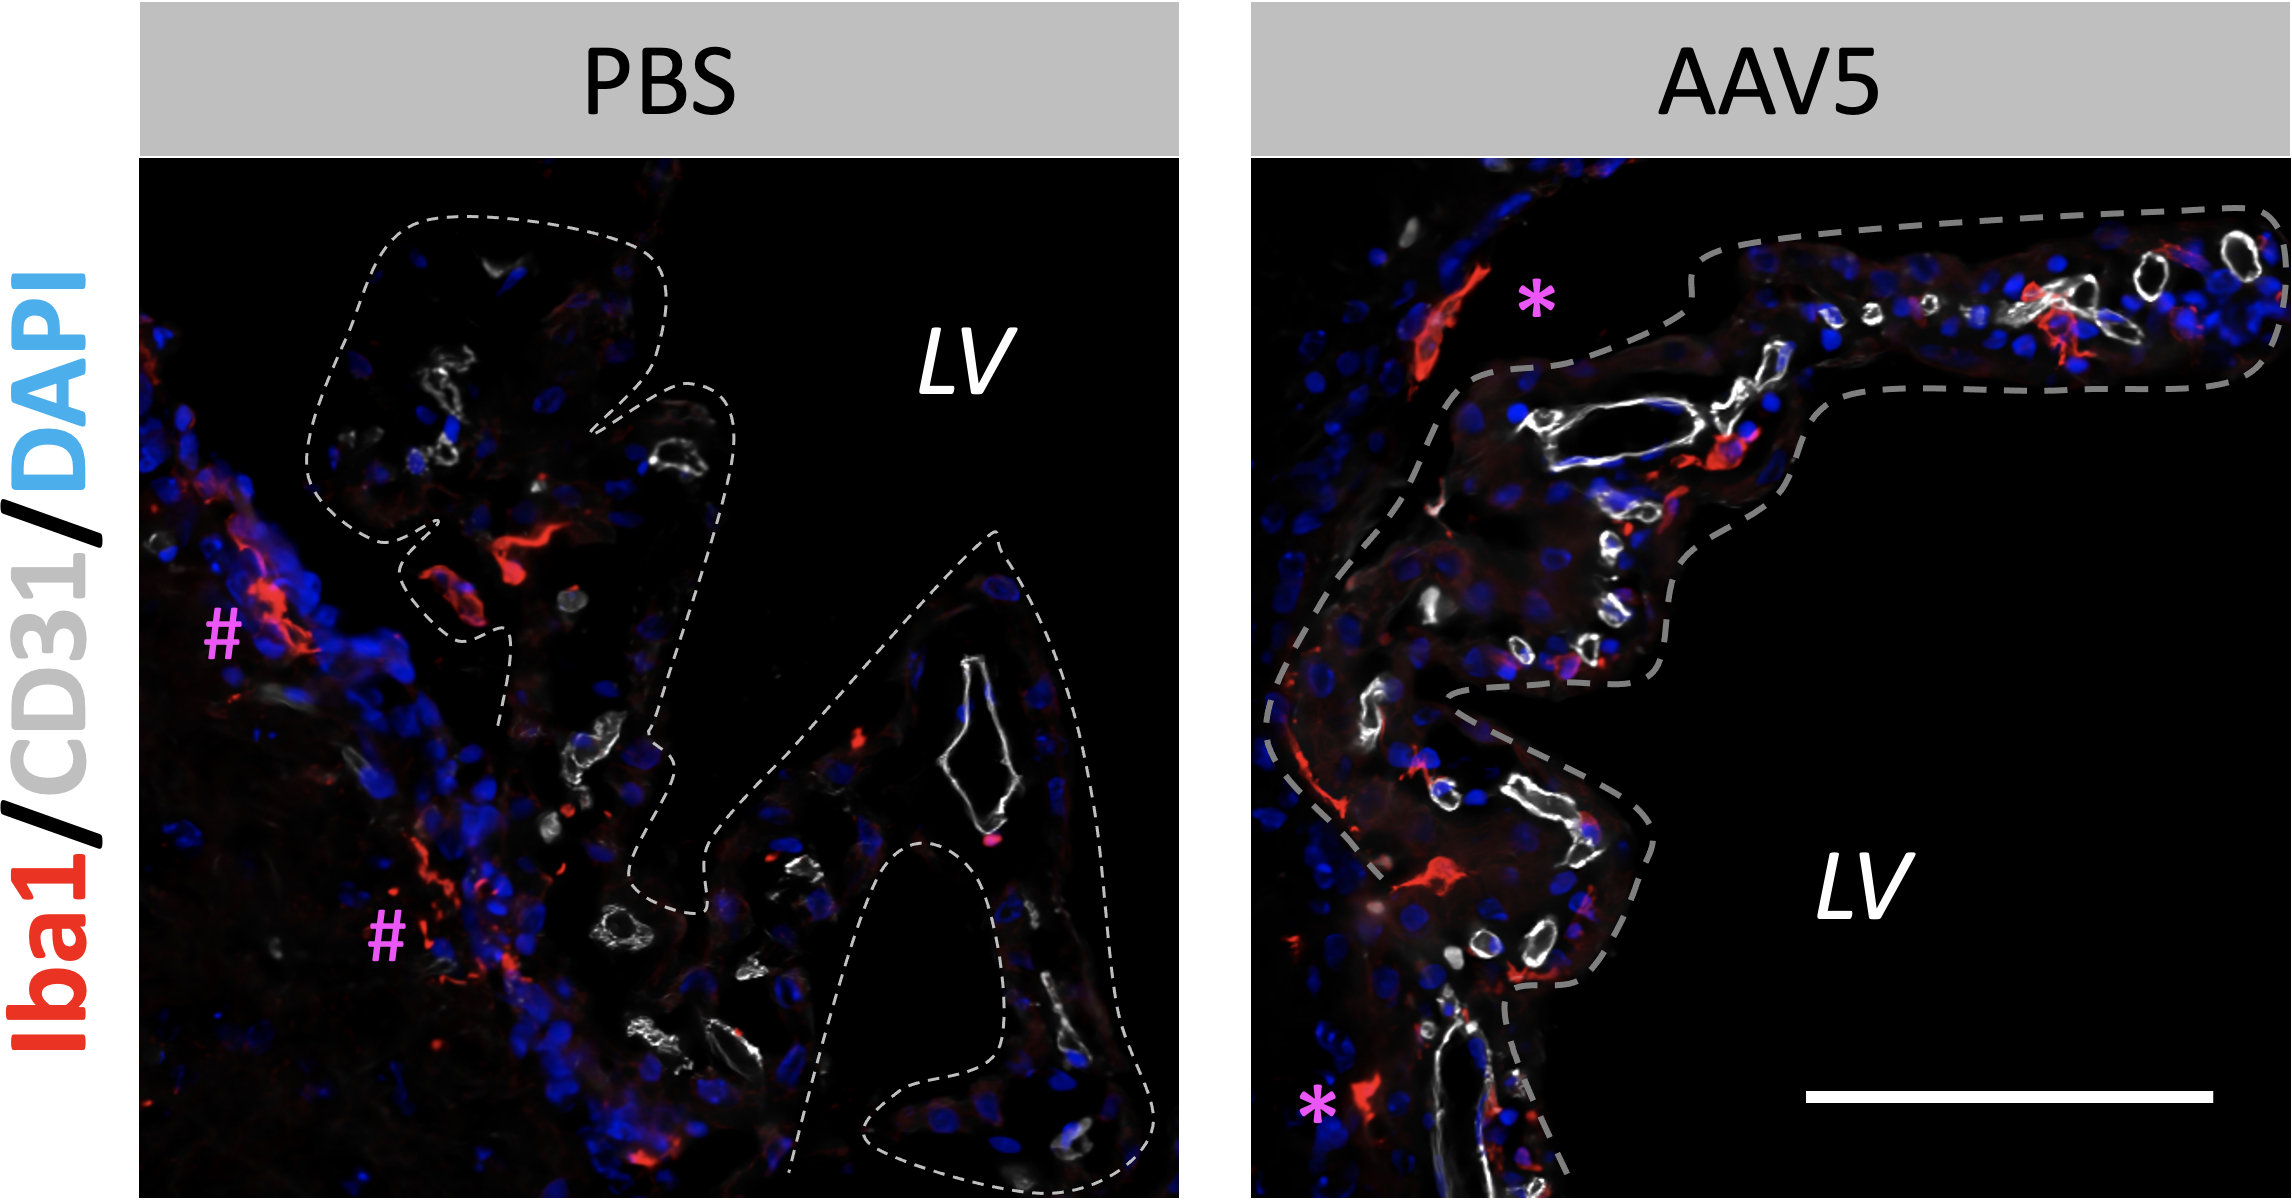** | **E** |  | **F** |  |
| --- | --- | --- | --- | --- | --- |
|  |

| **G** | | **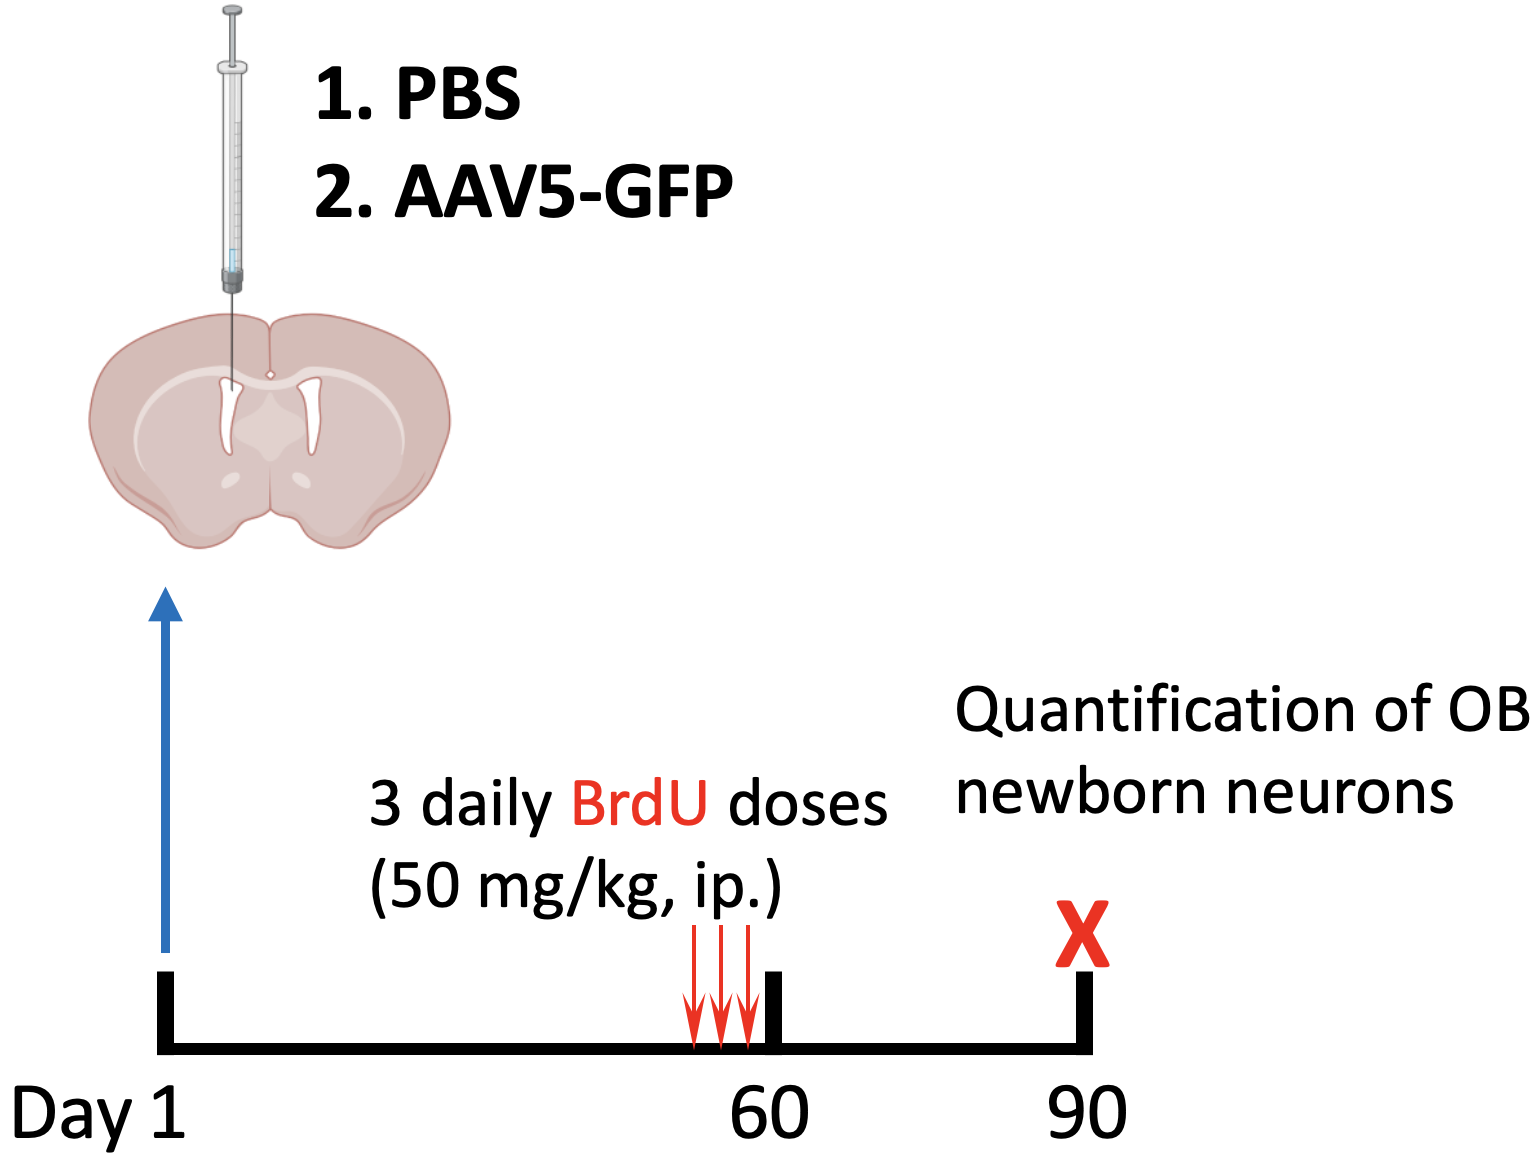** | **H** | | **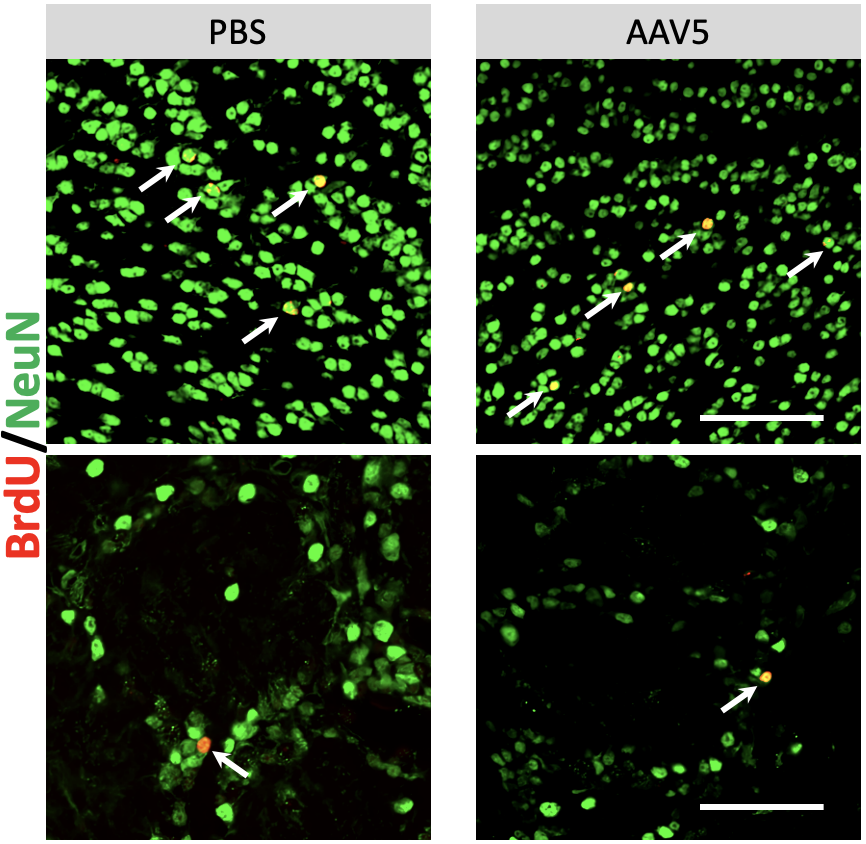** |
| --- | --- | --- | --- | --- | --- |
| **I** | |  |  | |
| **J** |  | | |

(**A**). Experimental timeline assessing the effects of AAV5 ICV injection on proliferation of SVZ NSCs.

(**B** and **C**). Representative images and quantification of proliferating SVZ NSCs 30 days post ICV injection of AAV5. Of note, mice used in this experiment were 5-month-old. n =4; scale bar = 100 µm.

(**D**-**F**). Representative images and quantification of Iba1(+) cells in the CP and SVZ 30 days post ICV injection of AAV5. Relative Iba1(+) cell density in the CP and SVZ were provided in (E) and (F), representatively. n =3; scale bar = 50 µm.

(**G**). Experimental timeline assessing the effects of AAV5 ICV injection on SVZ adult neurogenesis to the OB.

(**H** and **I**). Representative images and quantification of BrdU(+)/NeuN(+) newborn neurons in the OB. In (H), the upper panel shows newborn neurons in the GCL, and the lower represents newborn neurons in the GL. n =4; scale bar = 50 µm.

(**J**). Body weight monitor post ICV injections (n = 5).

**Figure S3. Glial population in the OB 6 months post CP-targeted SMPD3 knockdown.**

| **A** | | **B** | | | |
| --- | --- | --- | --- | --- | --- |
| **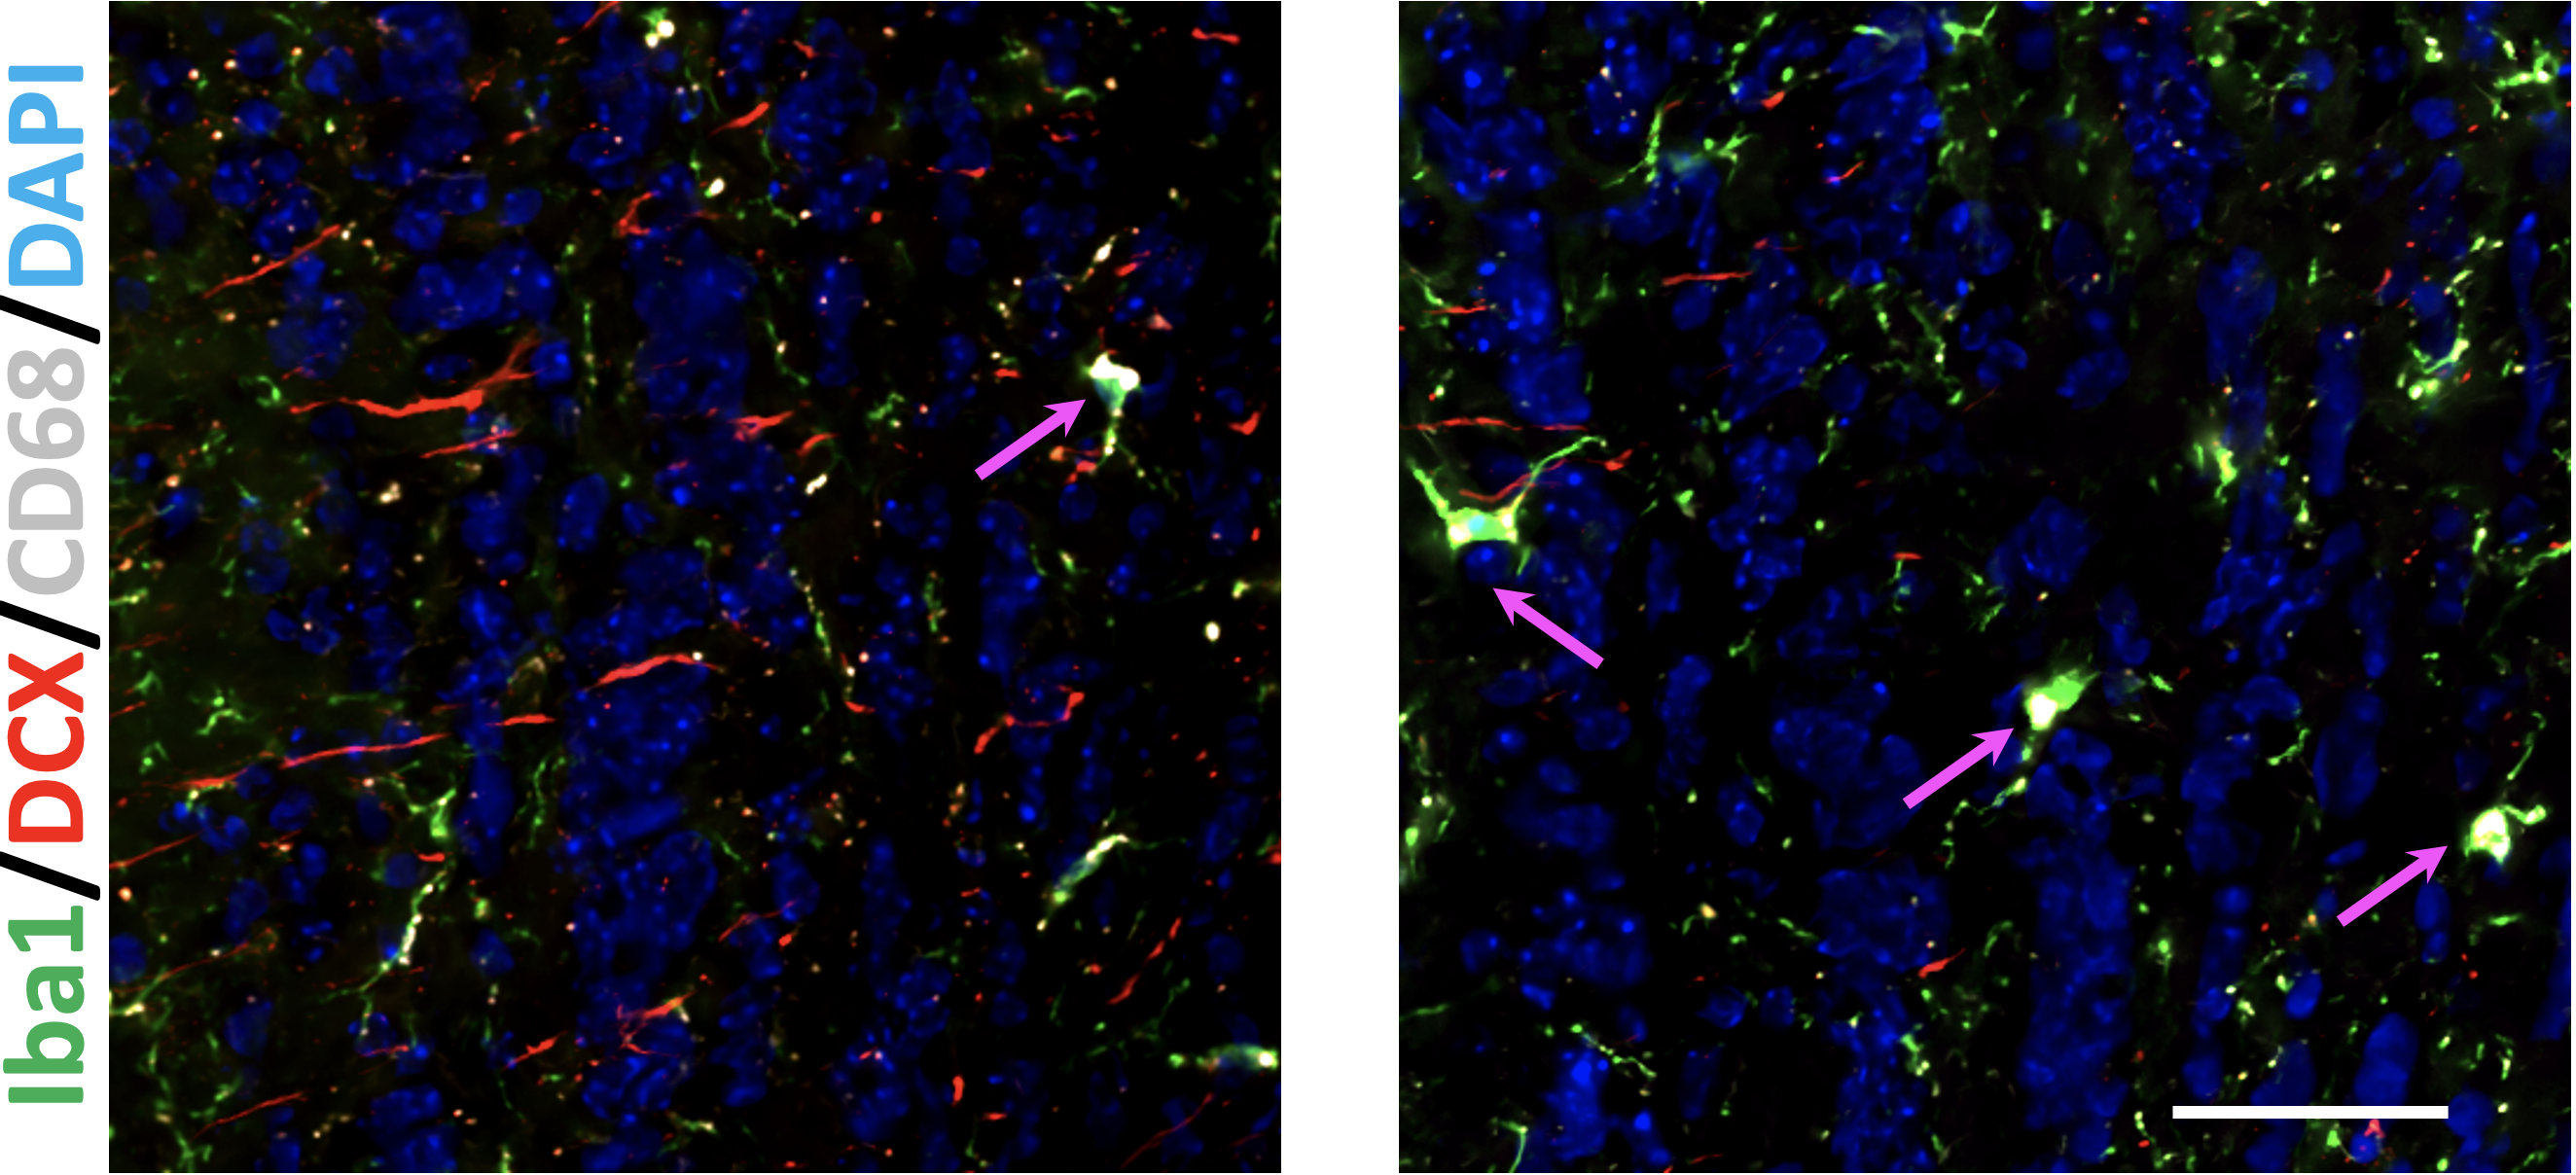** | |  | | | |
| **C** | | **D** | |
| 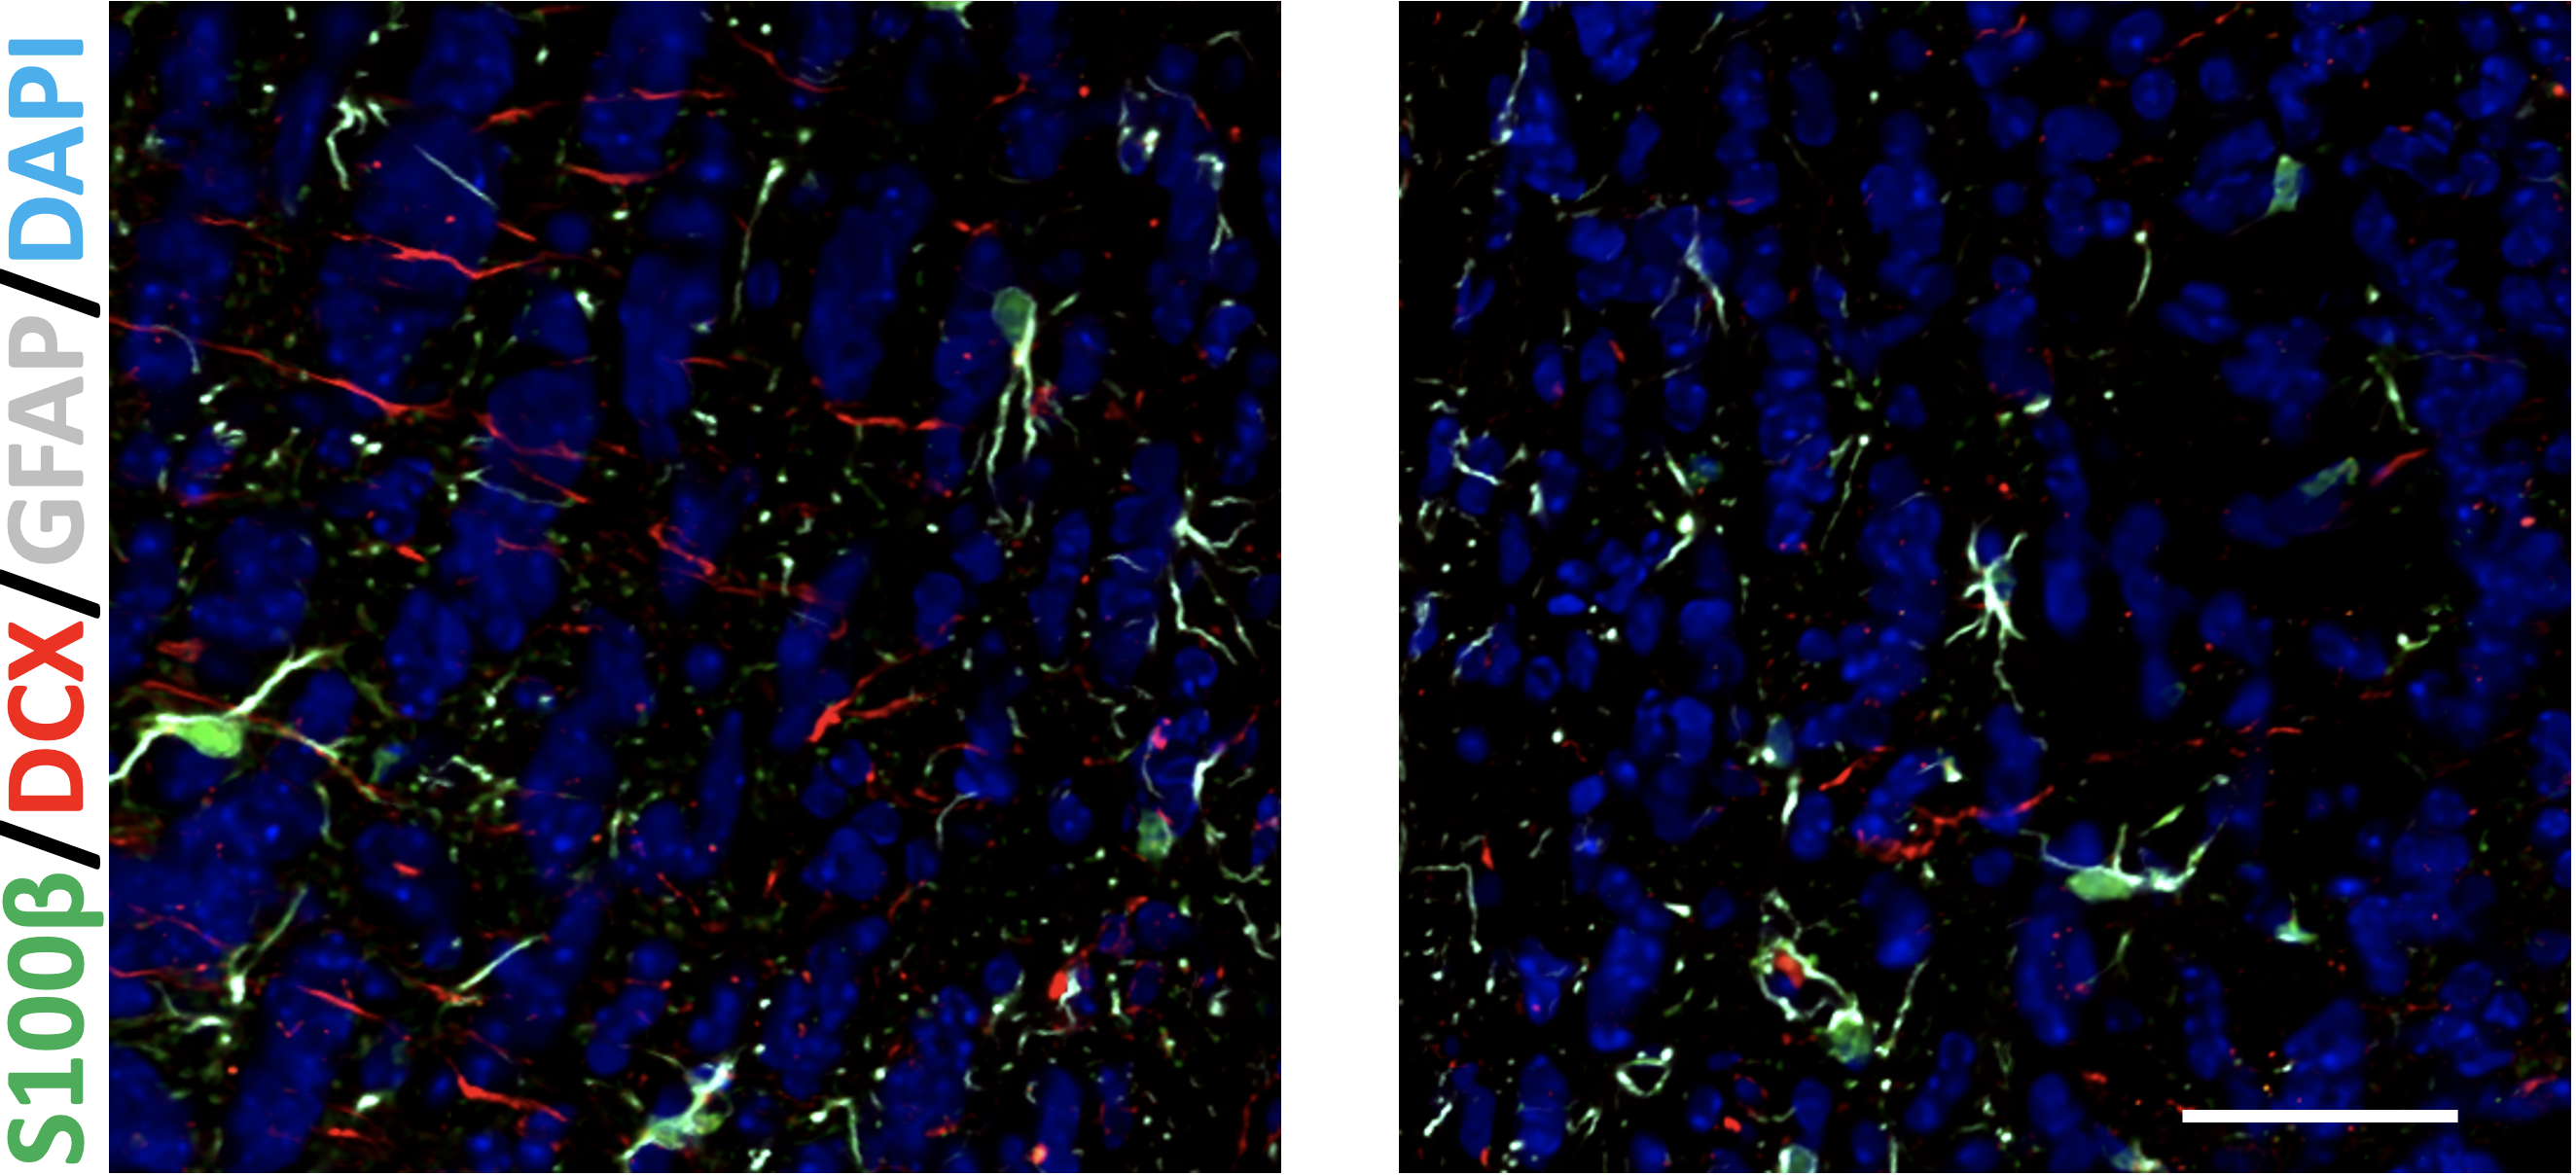 | |  | |
| **E** | | **F** | | |
| 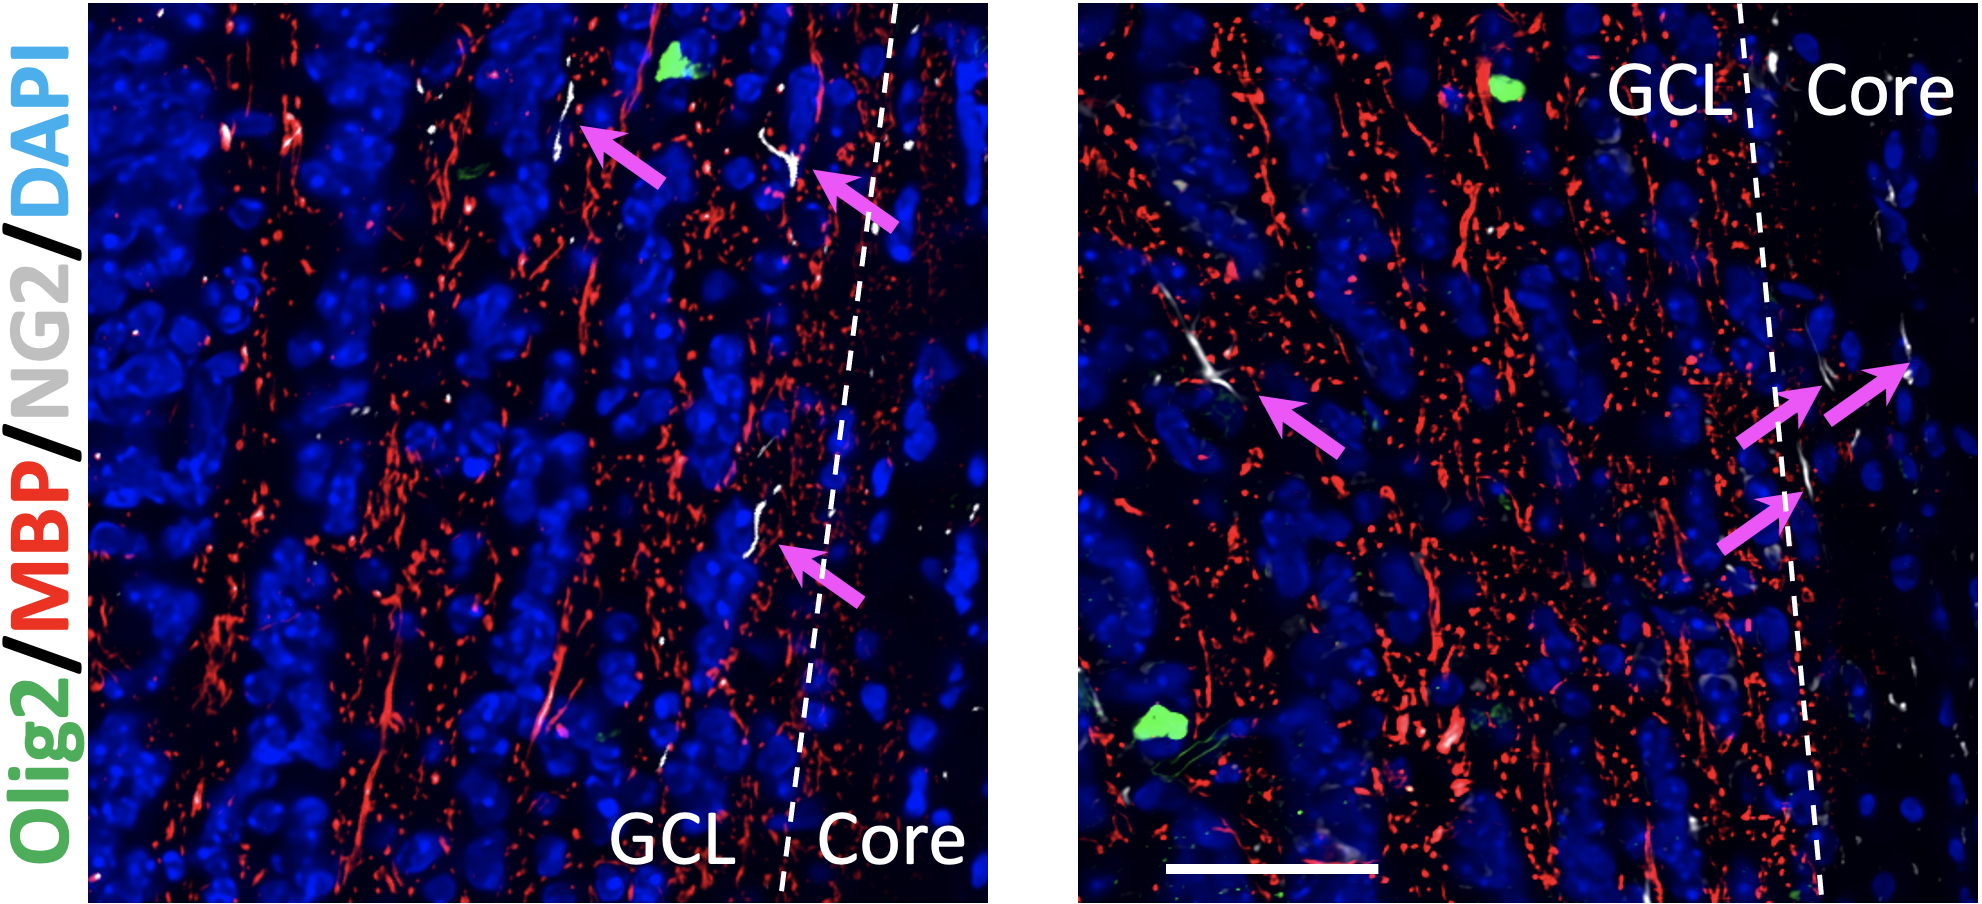 | |  | | |
| **G** | **H** | |
|  |  | |

(**A** and **B**). Representative images and quantification of Iba1(+) microglial cells and the CD68(+) activated phenotypes in the OB. n =4; scale bar = 50 µm. Arrows in pink mark enlarged Iba1(+)/CD68(+) cells.

(**C** and **D**). Representative images and quantification of GFAP(+)/S100β astrocytes in the OB. n =4; scale bar = 50 µm.

(**E**). Representative images of oligodendrocyte lineage cells in the OB. Scale bar = 50 µm. Arrows in pink mark bipolar NG2(+) cells.

(**F-H**). Quantification of MBP fluorescent intensity, Olig2(+) cell density, and NG2(+) cell density in the OB. n =4.
